1           Sensory processing sensitivity and axonal microarchitecture:  
2           Identifying brain structural characteristics for behavior

3  
4   **Szabolcs David\*<sup>1a</sup>, Lucy L. Brown<sup>2a</sup>, Anneriet M. Heemskerk<sup>1</sup>, Elaine Aron<sup>3</sup>, Alexander**  
5   **Leemans<sup>1b</sup> and Arthur Aron<sup>3b</sup>**

6  
7   <sup>1</sup>Image Sciences Institute, University Medical Center Utrecht, Utrecht, the Netherlands

8   <sup>2</sup>Department of Neurology, Einstein College of Medicine, Bronx, NY, USA

9   <sup>3</sup>Department of Psychology, Stony Brook University, Stony Brook, NY, USA

10  
11   <sup>a,b</sup>: These authors contributed equally to current work

12  
13  
14   \* Correspondence should be addressed to:

15   Szabolcs David

16   Image Sciences Institute

17   University Medical Center Utrecht

18   P.O. Box 85500

19   3508 GA Utrecht

20   Netherlands

21   Tel: +31 88 75 57772

22   E-mail: s.david@umcutrecht.nl

23  
24  
25   Running title: Sensory Processing Sensitivity and Axonal Microarchitecture

26  
27  
28   **Keywords: diffusion MRI; diffusion tensor imaging; mean diffusivity, highly sensitive people,**  
29   **sensory processing sensitivity, cingulum microstructure**

30 **Abstract**

31 Previously, researchers used functional MRI to identify regional brain activations associated with  
32 sensory processing sensitivity (SPS), a proposed normal phenotype trait. To further validate SPS as a  
33 behavioral entity, to characterize it anatomically, and to test the usefulness in psychology of  
34 methodologies that assess axonal properties, the present study correlated SPS proxy questionnaire  
35 scores (adjusted for neuroticism) with diffusion tensor imaging measures. Participants (n=408) from  
36 the Young Adult Human Connectome Project that are free of neurologic and psychiatric disorders were  
37 investigated. We computed mean diffusivity (MD), radial diffusivity (RD), axial diffusivity (AD) and  
38 fractional anisotropy (FA). A voxelwise, exploratory analysis showed that MD and RD correlated  
39 positively with SPS proxy scores in the right and left subcallosal and anterior ventral cingulum bundle,  
40 and the right forceps minor of the corpus callosum (peak Cohen's D effect size = 0.269). Further  
41 analyses showed correlations throughout the entire right and left ventromedial prefrontal cortex,  
42 including the superior longitudinal fasciculus, inferior fronto-occipital fasciculus, uncinate and arcuate  
43 fasciculus. These prefrontal regions are generally involved in emotion, reward and social processing.  
44 FA was negatively correlated with SPS proxy scores in white matter of the right  
45 premotor/motor/somatosensory/supramarginal gyrus regions, which are associated with empathy,  
46 theory of mind, primary and secondary somatosensory processing. Region of interest (ROI) analysis,  
47 based-on previous fMRI results and Freesurfer atlas-defined areas, showed small effect sizes, (+0.151  
48 to -0.165) in white matter of the precuneus and inferior frontal gyrus. Other ROI effects were found in  
49 regions of the dorsal and ventral visual pathways and primary auditory cortex. The results reveal that  
50 in a large, diverse group of participants axonal microarchitectural differences can be identified with  
51 SPS traits that are subtle and in the range of typical behavior. The results suggest that the heightened  
52 sensory processing in people who show SPS may be influenced by the microstructure of white matter  
53 in specific neocortical regions. Although previous fMRI studies had identified most of these general  
54 neocortical regions, the DTI results put a new focus on brain areas related to attention and cognitive  
55 flexibility, empathy, emotion and low-level sensory processing, as in the primary sensory cortex.  
56 Psychological trait characterization may benefit from diffusion tensor imaging methodology by  
57 identifying influential brain systems for traits.

## 58 **1. Introduction**

### 59 **1.1 Sensory processing sensitivity (SPS)**

60 Sensory processing sensitivity (SPS) (Aron and Aron, 1997) is proposed to be a normal phenotype trait  
61 observable as a high degree of environmental sensitivity (Pluess, 2015). It is unrelated to sensory  
62 processing disorder. Heritability explains about 42% of the variance in twin studies (Assary et al.,  
63 2020). The trait is present in about 20% of the population (Lionetti et al., 2018); the estimated number  
64 varies from 15% (Kagan, 1997) to 30% (Pluess et al., 2018). A similar proportion is found in many  
65 other species, suggesting the presence of two major survival strategies (Wolf et al., 2008): (1) SPS: A  
66 high level of attention to environmental stimuli and observing carefully before acting and (2) a normal  
67 level of attention to the environment and thus being the first to act. High attention to the environment  
68 appears only in a minority of a population because this high sensitivity benefits an individual only if  
69 the majority of members of the species lack it (negative frequency dependence).

70 In humans this increased sensitivity compared to the general population is hypothesized to result from  
71 a greater depth of processing of sensory input, e.g. using many cognitive tags (Aron et al., 2012; Aron  
72 and Aron, 1997). Lockart et. al. (Lockhart et al., 1976) suggested that memory is enhanced by  
73 processing information to deeper cognitive levels by using a letter, word, word in context, or word  
74 abstracted from many contexts, a concept important to educational methodology (Leow, 2018). This  
75 type of processing, using semantics or many contexts to remember a visual stimulus, is thought to  
76 enhance awareness of subtle stimuli and increase emotional responsiveness to stimuli in people with  
77 SPS. The emotional responsiveness may in turn act as a motivator for the depth of processing  
78 (Baumeister et al., 2007).

79 Research on SPS is growing, for a review see (Greven et al., 2019). For example, research using fMRI  
80 found SPS was associated with significantly greater activation in brain areas involved in higher-order  
81 visual processing, which is more evidence for greater depth of processing in SPS compared to the  
82 general population. However, there are many open questions, especially about neuroanatomical  
83 correlates. There has been no previous research that investigates microstructural changes using  
84 diffusion tensor imaging or similar techniques.

85 SPS does not appear to be a disorder, given the percentages in the population, its presence in many  
86 species, and its functionality as a successful survival strategy. In a review comparing fMRI studies of  
87 SPS (Acevedo et al., 2018), autism spectrum disorder, schizophrenia, and post-traumatic stress  
88 disorder, the authors conclude that SPS engages brain regions differently from these disorders, namely  
89 those that are involved in reward processing, memory, physiological homeostasis, self-other  
90 processing, empathy, and awareness. However, SPS can be related to disorders in that it leads to greater

91 susceptibility to environmental influences (Belsky and Pluess, 2009). For example, adults high on SPS  
92 scores who report difficult childhoods are more prone to depression, anxiety, and shyness (Aron et al.,  
93 2005); however, young children who exhibit SPS and had especially good childhood environments  
94 performed well on measures of social and academic competence (Pluess and Belsky, 2010), while those  
95 with worse environments fared poorly.

96 The trait also has been shown to lead to greater positive outcomes following interventions (Nocentini  
97 et al., 2018; Pluess and Boniwell, 2015), again suggesting that scores on the measure are correlated  
98 with greater susceptibility to environmental influences. For example, a study (Karam et al., 2019) of  
99 Syrian refugee children suggests that high-SPS scorers' previous experience with family trauma  
100 (abuse, neglect, etc.) appeared to prepare them to be less affected by war trauma, while those with  
101 positive family histories reported more trauma from similar war-related events, again suggesting a  
102 survival strategy of noticing more rather than simply needing a positive childhood to adjust well to any  
103 circumstance. Differential susceptibility makes the sample in the present study particularly valuable  
104 given that participants were screened to avoid those with psychological disorders, that axonal  
105 microstructural differences possibly due to a seriously problematic past would not confound our results.

## 106 **1.2 The Young Adult- Human Connectome Project**

107 The dataset of the Young Adult Human Connectome Project (YA-HCP) offered a large group to  
108 analyze for a normal psychological variable and any relationship it might have to axonal  
109 microarchitectural measures. This open data cohort includes high quality imaging data and an extensive  
110 range of data analysis options. There is also extensive psychological testing for each participant.

## 111 **1.3 Proxy scale used to measure SPS**

112 The questionnaire measure for SPS used in previous studies is called the HSP or Highly Sensitive  
113 Person Scale (Aron and Aron, 1997). The YA-HCP testing does not include the HSP Scale and it was  
114 not feasible to re-contact participants to administer it. However, the YA-HCP dataset does include a  
115 substantial number of multi-item self-report personality measures. Thus, it was possible to identify a  
116 subset of items in the YA-HCP dataset that could serve as a proxy measure. As described in the  
117 Methods, we developed and validated in other groups a 17-item proxy scale. We call this scale that  
118 measures SPS in the present report the neuroticism-adjusted residual proxy HSP scale, or Proxy HSP  
119 Scale.

## 120 **1.4 Microstructural characteristics: Diffusion Tensor Imaging**

121 Microstructural characteristics associated with SPS would be another strong piece of evidence that it  
122 is a significant, reliable psychological trait. Also, identification of brain regional effects contributes to

123 better understanding of SPS functional systems. Thus, we used diffusion tensor imaging (DTI) to  
124 identify any possible axonal microstructural characteristics for SPS. We captured measures from mean  
125 diffusivity (MD), radial diffusivity (RD), axial diffusivity (AD) and fractional anisotropy (FA). First,  
126 we used an exploratory voxelwise analysis for the whole brain. In addition, we used fMRI data from  
127 previous studies to carry out a region of interest (ROI) analysis.

### 128 **1.5 Previous fMRI studies**

129 Several fMRI studies helped to validate SPS as a psychological trait affecting sensory processing by  
130 finding correlations between the standard self-report measure of SPS and neurophysiological events  
131 during a variety of perceptual tasks. These studies provided the locations for the ROI analysis. The first  
132 study used a task of perceiving subtle differences in neutral landscapes (Jagiellowicz et al., 2011).  
133 When detecting minor (vs major) changes in the landscape, high scores on the standard HSP Scale  
134 were associated with greater activation in brain areas involved in higher-order visual processing: left  
135 occipitotemporal, bilateral temporal, and medial and posterior parietal regions.

136 Another fMRI study looked at culturally influenced visual perception (Hedden et al., 2008). The  
137 researchers gave 10 European-Americans and 10 East-Asians a visuospatial task that was either context  
138 independent (judging the length of a line independent of a surrounding box, the absolute condition,  
139 typically harder for Asians) or context dependent (judging the length of a line while paying attention  
140 to the box, the relative condition, typically harder for Americans). Each group exhibited greater  
141 activation for the culturally non-preferred task in frontal and parietal regions associated with greater  
142 effort in attention and working memory. In the two cultural groups, the HSP Scale scores moderated  
143 the brain activations such that neither cultural group with high HSP scores showed greater activation  
144 on their culturally more difficult task (Aron et al., 2010). The data suggest that the high-SPS  
145 participants were processing both the relative and absolute conditions, unaffected by their culture, by  
146 paying close attention to details of the stimulus.

147 Another fMRI study used visual stimuli that were photos of familiar or unfamiliar faces with happy,  
148 neutral, or sad expressions (Acevedo et al., 2014). Across all conditions standard HSP scores were  
149 associated with increased brain activation of regions involved in attention and action planning (in the  
150 cingulate and premotor area (PMA). For happy- and sad-face conditions, SPS was associated with  
151 activation of brain regions involved in self-awareness, integration of sensory information, empathy,  
152 and action planning (e.g., cingulate, insula, inferior frontal gyrus [IFG], middle temporal gyrus [MTG],  
153 and premotor area [PMA]).

154 Finally, SPS individuals showed substantial differences compared to others in brain activation in  
155 response to emotional (versus neutral) images (nonsocial visual International Affective Picture System  
156 images; (Acevedo et al., 2017)). Standard HSP scores were associated with neural activations in the  
157 temporal/parietal area and areas that process emotional memory, learning, awareness, reflective  
158 thinking, and integration of information. There were similar results in the same study for an SPS x  
159 Quality of Childhood Parenting (QCP) interaction. For positive stimuli, SPS showed significant  
160 correlations with activation in subcortical areas involved in reward processing, self-other integration  
161 (insula and IFG), calm (PAG), and satiation (subcallosal AC). These were stronger with increasing  
162 QCP. For negative stimuli, the SPS x QCP interaction showed significant activation in the amygdala  
163 and prefrontal cortex (PFC) involved in emotion and self-control.

164 Overall, these fMRI studies show that SPS is associated with greater activation in multiple brain areas  
165 when processing subtle visual differences in neutral stimuli as well as stimuli evoking emotion or  
166 empathy and personally relevant social stimuli. The ROIs for this study were in areas whose activation  
167 was correlated with SPS under these conditions.

## 168 **1.6 Study aims**

169 We undertook this study to further validate and contribute to the broad understanding of SPS as an  
170 innate trait associated with a high level of perceptual attention. This trait accounts for a broadly-defined  
171 attentional survival strategy: high-level attention to detail. In the present research, we correlated HSP  
172 proxy questionnaire scores with DTI measures to assess any axonal microarchitecture measures  
173 associated with SPS, particularly in brain areas that might be related to primary and secondary  
174 perceptual processes. Importantly, we also wanted to determine if a subtle behavioral trait such as SPS  
175 could be detected using DTI. The results suggest that the heightened sensory processing in people with  
176 the SPS trait may be influenced by the anatomical microstructure of white matter in specific neocortical  
177 regions. Although previous fMRI studies had identified most of these general neocortical regions, the  
178 DTI-based results put a new focus on attention and flexibility, low-level primary sensory processing,  
179 empathy, emotion and depth of processing. Psychological trait characterization may benefit from  
180 diffusion tensor imaging methodology by identifying influential brain systems for the trait.

## 181 **2 Methods**

### 182 **2.1 Participants**

183 We used data from the Young Adult Human Connectome Project (YA-HCP) WU-Minn-Oxford  
184 consortium S500 release (Essen et al., 2012; Glasser et al., 2013), from which we used data of 408  
185 subjects (243 females and 165 males) and self-report questionnaire data. Age of the subjects was

186 between 22 and 36 years (mean age for females: 29.2 years, standard deviation: 3.4 years; mean age  
187 for males: 28.9 years, standard deviation: 3.6 years); ethnicity: 66.18 % White/European ancestry,  
188 20.59% African-American, 7.84% Latino, 1.96% Asian or Nat. Hawaiian or other Pacific, 1.96% not  
189 reported, 1.47% more than one. The participants were free of documented psychiatric or neurological  
190 disorders.

## 191 **2.2 Assessment of sensory processing sensitivity**

192 The YA-HCP does not include the standard HSP scale for SPS, but does include multiple psychological  
193 measures. Therefore, we systematically identified and tested a subset of items in the HCP dataset that  
194 could serve as a proxy measure. First, the authors of the standard measure, the Highly Sensitive Person  
195 (HSP) Scale (Aron and Aron, 1997) examined the various self-report measures in the YA-HCP data,  
196 which are based on the NIH Toolbox, and selected 55 candidate items to assess SPS. We administered  
197 the 55 candidate items along with the standard HSP Scale (in counterbalanced order) to a sample of  
198 401 mTurk workers (crowd sourcing marketplace for questionnaires; see Amazon Mechanical Turk,  
199 mturk.com). Of these 401, 19 failed one or more of four attention checks and 1 gave identical responses  
200 (all 1s or all 7s) to all the items in three of the main scales. The remaining sample of 381 included 174  
201 women, 206 men, and 1 who did not indicate gender; mean age was 35.88 (SD = 11.23); 72%  
202 White/European ancestry, 8% African-American, 8% Asian, 7% Latino; 5% other.

203 We randomly divided the mTurk sample's data into three groups, with the constraint of equal  
204 percentages of each gender in each group: Group 1, n=181, Groups 2 and 3, n=100 each. There were  
205 no significant differences in age or ethnicity between subgroups. In Group 1, we correlated each  
206 candidate item with the standard HSP Scale. Using those results, we explored several different subsets  
207 of the 55 items, checking each subset both for overall correlation with the HSP Scale and internal  
208 validity, and we identified a potentially optimal subset. Next, we administered this subset to Group 2  
209 and made further adjustments, then tested this further adjusted version in Group 3 and also tested the  
210 reliability of this set of items in the overall HCP sample.

211 The resulting scale consisted of 17 items (see Table 1). In our mTurk sample of 381, the correlation of  
212 this 17-item measure with the standard HSP scale was 0.79; adjusting for reliabilities (0.93 for the HSP  
213 Scale, 0.79 for the 17-item proxy) yielded a deattenuated correlation of 0.89. This indicates that the  
214 17-item subset is strongly parallel to the standard HSP Scale, and thus an appropriate measure of SPS.  
215 The alpha for these 17 items in the YA-HCP dataset was 0.62, which we considered marginally  
216 adequate, especially given that these items were taken from separate, not contiguous, scales in the YA-  
217 HCP dataset that measure using diverse response types. By contrast, in the mTurk sample the items

218 from these scales were all administered close to each other. This only marginally adequate reliability  
219 does mildly undermine the strength of analyses, suggesting that some failures to find significant results  
220 may be due to the low reliability, although significant results obtained in spite of this are likely to be  
221 especially robust and may underestimate the actual effect size.

222 Finally, to control for negative affect, we further adjusted HSP scores. Typically, there is a substantial  
223 correlation between HSP scale scores and negative affectivity or neuroticism. Thus, it is standard  
224 practice to partial out scores on a measure of negative affect in SPS studies. We did so in the present  
225 study by creating standardized residuals of the proxy HSP Scale using mean NEO Neuroticism Scale  
226 scores from the sample. Thus, we computed neuroticism-score-adjusted studentized residuals, using a  
227 standard model in the statistical program SPSS, which shows HSP scores in terms of a standard  
228 deviation having negative and positive values. These scores were used to analyze the data and examples  
229 are shown in the graph in Figure 1.

### 230 **2.3 Imaging data & processing**

231 We used the minimally processed diffusion magnetic resonance images (dMRI) (Sotiropoulos et al.,  
232 2013), resulting in 90 diffusion-weighted images (DWIs) and 9 non-DWIs available for each  
233 participant with b-value of 1000 s/mm<sup>2</sup>. ExploreDTI version 4.8.6. (Leemans et al., 2009) and the  
234 REKINDLE (Tax et al., 2015) tensor estimation approach was used to calculate the voxelwise  
235 eigenvalues and eigenvectors. FA, MD, AD and RD maps were calculated from the fitted tensor model  
236 and warped to the MNI template. We also corrected for the gradient nonlinearities in the diffusion-  
237 weighted gradients (Bammer et al., 2003; Mesri et al., 2019), by using the voxelwise pattern of b-  
238 values and gradient direction during tensor estimation. The mean FA mask was calculated using all  
239 subjects and thresholded at FA > 0.2 to identify a white matter mask to limit the spatial extent of the  
240 statistical tests. Computations were performed on a Dell multi-core parallel processing system with 72  
241 Intel Xeon E7-8870 v3 @2.10Ghz dual cores with 1 TB RAM.

### 242 **2.4 Statistical tests**

243 To investigate the correlation between the SPS scores and diffusion measures (FA, MD, AD, and RD),  
244 we used the nonparametric t-test via Permutation Analysis of Linear Models (PALM) (Eklund et al.,  
245 2016; Holmes et al., 1996; Nichols and Holmes, 2003; Winkler et al., 2014) with 10000 iterations.  
246 Significance was determined at  $p_{\text{corr}} < 0.05$  using family-wise error rate (FWER) adjustment to correct  
247 for multiple comparisons, which corrected for multiple contrasts and modalities as well (Winkler et al.,  
248 2016b). Threshold-Free Cluster Enhancement (TFCE) (Smith and Nichols, 2009) was used to amplify  
249 p-values. Calculation speed was accelerated using the tail approximation (Winkler et al., 2016a).



250 Because a large number of subjects can produce highly statistically significant results for small effects,  
251 Cohen's D effect sizes were calculated and are the statistic we emphasize. FWER-corrected p-value  
252 maps were fed into the FSL tool automated atlas query (*autoaq*) to facilitate the anatomical  
253 interpretation of the statistically significant voxels.

254 In a separate analysis, the voxelwise effect size maps were thresholded at Cohen's  $D > 0.1$ , regardless  
255 of the associated p-values, and the largest connected component (cluster) was selected using the  
256 *bwconncomp* MATLAB function. Exploring the non-trivial effect sizes may provide additional  
257 information regarding the spatial extent of the HSP scale – DTI metric relationship.

## 258 **2.5 Region of Interest Analysis**

259 In addition, we performed region of interest (ROI) analysis for primary sensory processing areas and  
260 areas associated with emotion processing based on previous data (Acevedo et al., 2017, 2014; Aron et  
261 al., 2010; Jagiellowicz et al., 2011). White matter ROIs were defined by the FreeSurfer (FS) 'wmparc'  
262 atlas. Thus, the ROIs used larger areas than those detected in previous fMRI studies, which may dilute  
263 any smaller regional significant effect. For example, previous studies found functional activations in  
264 the angular gyrus, temporoparietal junction and supramarginal gyrus that are all within the "inferior  
265 parietal" ROI region. Thus, we report the findings for some potentially diluted ROIs with P values  
266  $>0.05$ , because these were planned comparisons and hypothesis-driven. The ROIs tested were white  
267 matter right and left: bankssts, caudal anterior cingulate, cuneus, entorhinal, fusiform, inferior parietal,  
268 inferior temporal, lateral occipital, lateral orbitofrontal, middle temporal, paracentral, parsopercularis,  
269 pericalcarine, postcentral, precuneus, superior parietal, transverse temporal (primary auditory), and  
270 insula.

271 ROI-based statistical testing was performed similarly to the voxelwise tests for all regional mean DTI  
272 metrics. PALM was utilized along with 10000 iterations with FWER adjustment and tail  
273 approximation. Furthermore, regional volume has been demonstrated to influence DTI estimates (Vos  
274 et al., 2011). Therefore, the ROI volume was considered as a co-variate of no-interest.

## 275 **3. Results**

### 276 **3.1 Range of HSP Scores and diffusivity values**

277 The raw HSP proxy questionnaire scores ranged from 1.71 to 3.82 (1 to 5, possible scores). HSP proxy  
278 residual scores, which are standard deviations from the mean, were used for the analyses and they  
279 ranged from -2.31 to +3.75 at the maximum effect size voxel (see Figure 1). The score range allowed  
280 an adequate sampling of HSP/SPS trait intensities. Based on approximate cutoffs from (Lionetti et al.,  
281 2018) latent class analysis of a large sample using the standard HSP scale, and adjusting their cutoff

282 for mean and SD in the Proxy scale, a score of 2.97 or greater was considered to reflect the HSP trait  
283 as influential in everyday life. Sixteen percent (n=65) of our participants showed this range of scores,  
284 a population prevalence estimated by other studies of HSP. Thus, a relatively small but statistically  
285 adequate number of our participants would be considered a highly sensitive person, leading to small  
286 effect sizes. Mean diffusivity ranged from 5-10x 10<sup>-4</sup> mm<sup>2</sup>/s, values found in normal, healthy brains  
287 (Lebel et al., 2008).

## 288 **3.2 HSP proxy scores correlated with brain axon microarchitecture measures**

### 289 **3.2.1 Whole brain, exploratory analysis**

290 We found positive correlations between HSP-proxy scores and MD within the ventromedial cingulate,  
291 ventromedial and ventrolateral prefrontal cortex. The largest effects were in the right anterior/ventral  
292 subcallosal cingulum bundle, extending into the forceps minor of the corpus callosum (peak Cohen's  
293 D = 0.269, P = 0.018). Fig. 1 shows the MD-HSP relationship at the peak effect size (MNI coordinates  
294 X:12, Y:44, Z: -10). Other MD effects were in the left anterior-ventral subcallosal cingulum bundle  
295 (Cohen's D=0.243, p =0.028). Fig. 2/A visualizes the voxelwise results from all comparisons on the  
296 brain template, while Table 2 lists the regions, MNI coordinates, p-values and effect sizes.

297 There was also a positive correlation for RD in regions overlapping the MD effects in the right  
298 anterior/ventral cingulum bundle and forceps minor of the corpus callosum (Cohen's D=0.170;  
299 p=0.041) and in a second region of the cingulum bundle (Left, Cohen's D=0.228; p=0.033 Right,  
300 Cohen's D=0.232; p=0.032; Table 2; Fig. 2/A).

301 Connected voxels showed a continuous band in the ventral cingulate and ventromedial prefrontal white  
302 matter from the posterior genu of the corpus callosum and radiation of the straight gyrus to the frontal  
303 pole, including the superior longitudinal fasciculus, inferior fronto-occipital fasciculus, uncinate and  
304 arcuate fasciculus as shown in Fig. 2/B. Furthermore, these results extended into the ventrolateral  
305 prefrontal cortex. White matter anatomical findings were near gray matter functional activations found  
306 previously in SPS subjects reacting to emotional stimuli (Acevedo et al., 2017) and to a romantic  
307 partner's emotional facial expression as shown in (Acevedo et al., 2014).

308 We also found a negative correlation between HSP-proxy scores and FA (Cohen's D=-0.181; p=0.042)  
309 in the right premotor cortex area in the region of the origin of the corticospinal tract (Fig 2/A).

310 Connected voxels covered a large area that included white matter in the region of the dorsomedial  
311 prefrontal cortex, premotor cortex, precentral gyrus (motor cortex), post central gyrus (somatosensory  
312 cortex), and supramarginal gyrus (somatosensory association cortex) in the parietal lobe (Fig. 2/B, 3).  
313 Fig. 3 shows the 3D render of the FA cluster, after thresholding only for effect size. This cluster was

314 near gray matter functional activations observed previously in SPS subjects reacting to a romantic  
315 partner's emotional facial expression as shown in Acevedo et al. (2014) (Acevedo et al., 2014) (Fig.  
316 2A/B).

### 317 **3.2.2 Region of interest analysis**

318 Region of interest analyses showed statistically significant positive RD and negative FA correlations  
319 with neuroticism-adjusted HSP-proxy scores in two areas. Figs. 4 and 5 show the ROI analysis results,  
320 while Table 3 shows the numerical summary. RD was positively correlated with scores in the left  
321 precuneus (Cohen's  $D=0.1509$ ,  $p=0.04$ ; Fig. 4/C) and marginally on the right (Cohen's  $D=0.143$ ,  
322  $p=0.06$ , Fig. 4 B/C). FA was negatively correlated with scores in the right parsopercularis/inferior  
323 frontal gyrus (Cohen's  $D=-0.165$ ,  $p=0.02$ ).

324 We report other areas at  $p>0.05$ , because they are primary visual sensory or higher order sensory  
325 processing areas that were activated in previous fMRI studies: the primary visual cortex (right lateral  
326 occipital area, RD: Cohen's  $D=0.14$ ,  $p=0.07$ , see Table 3; Fig. 4A/B), the right fusiform gyrus (MD;  
327 Cohen's  $D=0.137$ ,  $p=0.08$ , see Table 3; Fig. 4A/C), the right bank of the superior temporal gyrus (FA;  
328 Cohen's  $D=-0.147$ ,  $p=0.06$ ; see Table 3; Fig. 4/A), and the inferior parietal cortex that includes the  
329 angular gyrus, temporoparietal junction and supramarginal gyrus (FA Cohen's  $D: -0.136$ ,  $p=0.08$ ; Fig.  
330 4/A). These areas (Fig. 4/A) are part of the "ventral visual stream" that identifies "what" in the visual  
331 field and the "dorsal visual stream" that identifies "where" in the visual field (Milner and Goodale,  
332 2008; Ungerleider and Haxby, 1994). Functional activations of these regions were seen in SPS  
333 individuals during a visual discrimination task (Acevedo et al., 2017, 2012; Aron et al., 2010;  
334 Jagiellowicz et al., 2011). Finally, MD was positively correlated with HSP-proxy scores in the right  
335 transverse temporal/primary auditory cortex (Cohen's  $D=0.143$ ,  $p=0.06$ ; Fig. 4/A) and on the left  
336 (Cohen's  $D=0.131$ ,  $p=0.09$ ).

## 337 **4. Discussion**

### 338 **4.1 Overview**

339 This study established an anatomical correlate in the white matter of the brain for SPS individuals:  
340 those with the highest neuroticism-adjusted HSP proxy scores showed the greatest RD, FA and MD  
341 effects in several neocortical areas compared to those with the lowest HSP scores (not highly sensitive).  
342 Whole-brain, exploratory effects were greatest in brain regions involved in (a) higher-order emotion  
343 and reward processing: the ventromedial prefrontal cortex; and (b) in regions involved in empathy,  
344 self-other processing, attention and flexible coding of the environment: the premotor cortex and  
345 supramarginal gyrus. Compared to whole brain results, smaller ROI effects were also seen in self-other

346 processing areas (IFG, precuneus, fusiform, angular gyrus), higher order visual processing regions of  
347 the ventral and dorsal pathways (precuneus, inferior parietal, temporoparietal junction, STSb), and  
348 primary sensory processing areas such as the lateral occipital and transverse temporal (primary)  
349 auditory cortex.

350 All of these results are consistent with behavioral observations for SPS, which include sensory  
351 sensitivity, a tendency to be overwhelmed by sensory stimuli, and more attention to emotional and  
352 visual details of stimuli than others who do not show these traits (Aron et al., 2012; Aron and Aron,  
353 1997). The localization of the higher-order visual processing effects is also consistent with the previous  
354 studies, as reviewed in the Introduction, that used functional MRI to assess details of visual scenes and  
355 emotional reactions in highly sensitive people (Acevedo et al., 2017, 2014; Jagiellowicz et al., 2011).  
356 Thus, regional *functional* effects previously described were confirmed by microstructural effects. In  
357 addition, this is the first study to suggest involvement of primary sensory processing areas in the cortex,  
358 such as the visual and auditory cortex. The study also highlights the premotor cortex, with its  
359 connections to the supramarginal gyrus and attention functions. Somatosensory as well as  
360 environmental stimuli like vision are new possible highlights. Further, the study suggests a novel focus  
361 on the functions of the ventromedial prefrontal cortex. Finally, this is one of few studies to show small  
362 DTI anatomical effects within axonal tracts for normal-range behavioral traits, in this case sensory  
363 processing. Other studies have investigated neurologically normal subjects for DTI effects, mostly  
364 using the “big five” personality traits (Xu and Potenza, 2012), but these traits overlap very little with  
365 the HSP Scale, other than with neuroticism (which is controlled for in this study). In this study of a  
366 normal trait, the results indicate novel behavior-related brain regions to explore in future studies.

#### 367 **4.2 Ventromedial prefrontal cortex**

368 The largest effects were in white matter of the ventromedial and ventrolateral prefrontal cortex (De La  
369 Vega et al., 2016), on both right and left sides, but with more voxels on the right. These tracts connect  
370 major limbic system components: the hippocampus/peri-hippocampal cortex and amygdala to the  
371 medial prefrontal cortex. The subcallosal cingulum area, functionally connected with the ventromedial  
372 and ventrolateral prefrontal cortex (Dunlop et al., 2017) is known for its influence on mood, especially  
373 depression (Dunlop et al., 2017; Mayberg et al., 2013). The cingulum is also structurally connected to  
374 several of the ROIs that were correlated with HSP-proxy scores in this study: the precuneus, bank of  
375 the superior temporal sulcus, and supramarginal gyrus (Bathelt et al., 2019).

376 The ventromedial and lateral prefrontal cortex areas are described by (Hiser and Koenigs, 2018) as  
377 having three broad domains of psychological function: Decision making based on reward and value

378 (Sescousse et al., 2013); generation and regulation of negative emotions; and, social cognition, such as  
379 facial recognition, theory of mind, and processing self-relevant information. These of course interact  
380 strongly, especially given the social nature of humans, as in the function of the vmPFC in making moral  
381 decisions (Cameron et al., 2018) or in the “intuitive feeling of rightness” that guides decision making,  
382 often social in nature, as a function of memory retrieval (Hebscher and Gilboa, 2016).

383 The major results in the vmPFC in this study, as well as in the preceding fMRI studies (Acevedo et al.,  
384 2017, 2014), point to perhaps the most important aspect of SPS, which is “depth of processing” (Aron  
385 et al., 2012). The term is based on cognitive conceptualizations of levels of processing, with the idea  
386 that processing to deeper levels with more detailed cognitive contexts leads to better memory and better  
387 learning overall (Leow, 2018; Lockhart et al., 1976). The hypothesized evolutionary development of  
388 depth of processing in SPS is based on a computer simulation demonstrating that unusual responsivity  
389 to the environment will evolve when there are enough payoffs for an individual difference in noticing  
390 details, as long as most individuals do not notice these details (Wolf et al., 2008). (If all individuals  
391 did, there would be no special benefit.) That is, SPS is considered fundamentally an individual  
392 difference in “depth of processing” through careful observation of situation/time A in order to compare  
393 those details in memory to situation/time B and gain any potential benefits others miss. Individuals  
394 without the trait are thought not to process A as carefully, a strategy which is often equally or more  
395 effective, since B may bear no resemblance to A or there may be little reward in noticing any  
396 resemblances.

397 This type of careful processing relies on emotional motivation, the desire for rewards, such as winning,  
398 and the desire to avoid fear-related stimuli, such as losing (Baumeister et al., 2007). Hence  
399 understanding SPS as fundamentally about depth of processing for decision making based on reward  
400 value and social value is consistent with the significant differences that were found in the vmPFC, with  
401 its close connections to emotion-related memory processing areas such as the hippocampus and  
402 amygdala. Memory enhanced by motivation is, again, key to SPS, and specific activations occur for  
403 those high in SPS when processing emotional stimuli. For example, Acevedo et al (Acevedo et al.,  
404 2017) found in their comparison of responses to positive and negative stimuli that there were  
405 considerable differences in regional brain activation for high and low SPS in the vmPFC, in the same  
406 areas where microstructural differences were found in this study (Fig. 2), and in regions that mediate  
407 memory, attention, awareness, and reflective thinking.

## 408 **Theory of Mind**

409 In a meta-analytic review of the Theory of Mind, (Mar, 2011) highlighted a core mentalizing network:  
410 the mPFC, precuneus, bilateral pSTS, bilateral angular gyri, and the right IFG. These structures showed  
411 microstructural differences associated with SPS in this study, notably the mPFC, right IFG, precuneus,  
412 the bank of the STS and angular gyrus region. Second, this mentalizing network overlaps with the  
413 narrative comprehension network in a number of areas, including the mPFC, bilateral pSTS/TPJ,  
414 precuneus, and possibly the right IFG, again areas implicated by this study. Theory of Mind is central  
415 to the core concept of SPS, in that this survival strategy would require more reflection on another's  
416 behavior in order to accurately see from their perspective and correctly attribute to them their  
417 motivations and intentions.

## 418 **4.3 Premotor cortex, attention and somatosensory processing**

419 Finally, regarding the extensive cluster from the left premotor cortex to the post-central somatosensory  
420 and supramarginal gyrus, it could be expected that the arc of axonal effects we found in sensory  
421 processing areas from posterior to anterior (Figs. 2B, 4A and 5A) would include the premotor cortex,  
422 where the hypothesized deep processing associated with SPS would result in the preparation for action.  
423 This potential somatosensory/posterior parietal/premotor cortex involvement in SPS is a novel  
424 contribution to its understanding and may be helpful in future studies.

425 The importance of this broad premotor area continues to evolve (Rizzolatti et al., 1987). Rizzolatti et  
426 al. suggested a theory of attention focused on this area, presenting evidence that the premotor areas  
427 were the source of attention rather than a separate attention-directing mechanism. That is, attention is  
428 turned to a stimulus within the premotor area, so that attention consists of nothing more than  
429 preparation for a motor activity (e.g., an eye movement towards a stimulus deemed important or  
430 auditory areas preparing for a sound). Although refinements and extensions (Wollenberg et al., 2018)  
431 have occurred, this view of attention is still tenable, according to experiments by (Schubotz and Von  
432 Cramon, 2003).

433 Schubotz and Cramon distinguished the left premotor cortex, correlated in our study with SPS, as  
434 associated with nonspatial tasks and rapid acquisition of new motor sequences. Overall, evidence  
435 regarding the premotor area suggests “environmental features do not have to remind us of specific  
436 actions or movements to induce premotor activation on a more or less conscious level. Rather, features  
437 are represented in a highly fragmented format that allows for instant recombination and very flexible  
438 coding of any currently attended environment” (p. 126). (Schubotz, 2007) presented considerable

439 evidence that the premotor area (along with most of the areas in the brain associated with SPS) helps  
440 in the prediction of events.

441 Further, a mean diffusivity study by (Takeuchi et al., 2019) found that an area including the premotor  
442 cortex plays a major role in emotional salience and empathy. This area was also activated in the  
443 (Acevedo et al., 2014) fMRI study finding empathy for happy and distressed partners and strangers.  
444 Attention, flexible coding, prediction, somatosensory processing and empathy all fit with the theory  
445 that SPS involves attending to subtle stimuli that may be relevant for survival and predicting those  
446 environmental details that what will be relevant in future environments. Overall, these whole brain,  
447 exploratory analyses provide a picture that is consistent with behavior associated with SPS.

#### 448 **4.4 ROI results**

449 The particular ROIs with clear statistical significance were the left precuneus (RD, Cohen's D =  
450 +0.151,  $p=0.04$ ), part of the dorsal visual stream, and the right parsopercularis/IFG (FA, Cohen's D =  
451 0.165,  $p=.02$ ), associated with empathy. For the precuneus, the other side was marginally significant  
452 ( $p=0.06$ ), while for the IFG, the same side was marginally significant for RD as well (Cohen's D =  
453 0.137,  $p=0.07$ ). Also, the transverse temporal gyrus/primary auditory cortex (A1), part of the dorsal  
454 auditory stream was marginally statistically significant (MD, Cohen's D 0.143,  $p=0.06$ ).

455 As for the precuneus, fMRI studies (Cavanna and Trimble, 2006) of healthy subjects suggest it plays  
456 a major role in visuo-spatial imagery, episodic memory retrieval, and self-processing tasks, such as the  
457 experience of agency and taking the first-person perspective. All of these activities are more prominent  
458 in those high in SPS, and the precuneus was another area often correlated with SPS in fMRI studies.  
459 There is also an hypothesized role for the precuneus in consciousness itself (Cavanna, 2007), along  
460 with areas nearby in the posteromedial parietal cortex. It is especially active during the conscious  
461 resting state, but is deactivated when consciousness decreases (e.g., sleep, anesthesia, Alzheimer's).  
462 Indeed, it has been proposed that it is part of a larger network that correlates with self-consciousness,  
463 as it engages in self-related mental representations, self-reflection, and autobiographical memory  
464 retrieval. Meditation, which creates states of restful alertness, is associated with microstructural  
465 differences in the precuneus in practitioners compared to controls (Avvenuti et al., 2020; Shao et al.,  
466 2016). Without suggesting that SPS somehow results in more consciousness, it may well demonstrate  
467 an internal tendency for more awareness and integration of diverse aspects of inner and outer  
468 experience. Although the insula was not a factor in this study, it has a similar role in the brain and was  
469 found to be more active in the fMRI studies of SPS already cited, and has also sometimes been  
470 described as the "seat of consciousness" (Craig, 2009).



471 The right parsopercularis/IFG region was negatively associated with HSP proxy scores and FA  
472 ( $p=0.02$ ), and positively associated with RD ( $p=0.07$ ). IFG functions may be particularly important to  
473 recognize in further studies. In an fMRI study, the IFG region was positively associated with HSP  
474 scores during positive emotion conditions while looking at a spouse or stranger (Acevedo et al., 2014).  
475 It has been identified with a mirror neuron system (Iacoboni et al., 1999; Jabbi and Keysers, 2008; Van  
476 Overwalle and Baetens, 2009) that responds to the movements of others, and may facilitate the  
477 understanding of others' intentions and feeling of empathy. We previously suggested that this system's  
478 activation is consistent with HSPs' bias toward noticing positive expressions in others and high  
479 empathy (Acevedo et al., 2014).

480 Some of the ROI effects are along the dorsal and ventral visual/auditory pathways, which is especially  
481 noteworthy as they are, again, what one would expect given that the hypothesized fundamental  
482 characteristics of the SPS trait are depth of processing of sensory experiences and awareness of  
483 subtleties. These pathways are described as identifying the "what" (ventral stream) and "where" (dorsal  
484 stream) of what is seen and heard, taking sensory experience beyond its initial input (Milner and  
485 Goodale, 2008). The ventral stream in particular is associated with object recognition and form  
486 representation, the "what," and is strongly connected to the medial temporal lobe, which stores long  
487 term memories; the limbic system, which controls emotions; and joins with the dorsal stream, which  
488 identifies the "where." The dorsal stream is said to guide actions and recognize where objects are in  
489 space. It stretches from the primary visual cortex in the occipital lobe into the parietal lobe. It contains  
490 a detailed map of the visual field and serves to detect and analyze movements. Thus, it commences  
491 with purely visual functions, ending with spatial awareness at its termination. As with the ventral  
492 stream, processing of sensory input along the dorsal stream becomes "deeper" or more elaborate. It  
493 ends up contributing to recognizing spatial relations, body image, and physical coordination. Again, as  
494 SPS has been described, the trait is not characterized by better initial sensory perception, better hearing  
495 or eyesight, but by more complete processing of what is perceived along these two visual/auditory  
496 pathways. However, the potential involvement of primary visual, auditory and somatosensory areas  
497 suggested in this study leads to other questions for study of the most basic sensory detection and  
498 discrimination functions of these areas that may impact the higher-order processing regions.

499 The A1 cortex that we included as a ROI for this study is thought to operate very early in the recognition  
500 of sounds. For example, a study by (Warrier et al., 2009) found that non-Mandarin-speaking subjects  
501 who could successfully form an association between Mandarin Chinese "pitch patterns" and word  
502 meaning were found to have transverse temporal gyri (A1) with larger volume than subjects who had  
503 difficulty learning these associations. Successful completion of the task also was associated with a



504 greater concentration of white matter in the left A1 of the subject. In general, larger transverse temporal  
505 gyri seemed to be associated with more efficient processing of speech-related cues, which could aid  
506 the learning and perceiving of new speech sounds. The A1 cortex is also associated with inner speech,  
507 what (Hurlburt et al., 2016) might be considered a more advanced level of processing, but still  
508 preceding speech production. Although to date there are no studies of auditory functioning associated  
509 with SPS, it would seem to be a fruitful area for future research.

510 The superior temporal sulcus (STS bank,  $p=0.06$ ) is seen primarily as an area for higher visual  
511 processing. (Hein and Knight, 2008), in a review of carefully selected fMRI studies, concluded that the  
512 majority of findings implicate the STS in broader tasks involving theory of mind, audiovisual  
513 integration, motion processing, speech processing, and face processing. They conclude that rather than  
514 trying to pinpoint where in the STS these occur, it is best to view the function of the STS as varying  
515 according to the nature of network coactivations with different regions in the frontal cortex and medial  
516 temporal lobe during a particular task. This view is more in keeping with the notion that the same brain  
517 region can support different cognitive operations depending on task-dependent network connections,  
518 emphasizing the important role of network connectivity analysis in neuroimaging. It is consistent with  
519 current hypotheses about SPS that those high in SPS would show greater microstructural differences  
520 in an area associated with diverse types of processing (motion, speech, face, audiovisual) as well as  
521 theory of mind.

#### 522 **4.5 Microstructural differences: the physiological impact of positive MD/RA and negative FA** 523 **correlations**

524 The physiological impact of positive MD/RA and negative FA correlations is unclear (Soares et al.,  
525 2013). The findings in this study are smaller than those seen in previous studies of disease progression  
526 or aging (Nir et al., 2013; Voineskos et al., 2012). There is no neurological or behavioral pathology in  
527 the group that we studied. The psychological traits measured are subtle and part of the normal range of  
528 human behavior. Thus, the effects are part of a normal variability in the population, but may be markers  
529 of slight anatomical differences in axon size and organization, perhaps impacting the speed of  
530 communication among regions (Horowitz et al., 2015).

531 This study joins others that have looked at microstructural correlates of normal individual differences,  
532 such as personality traits (Xu and Potenza, 2012) and cognitive abilities (Bathelt et al., 2019). Since  
533 such phenotypic differences can be caused by multiple genetic and environmental effects, looking for  
534 common microstructure may be another useful way to identify such differences.

535 **4.6 Limitations**

536 A limitation of the study is its reliance on a proxy measure of SPS. Few questions in the YA-HCP  
537 questionnaire dataset addressed sensory processing directly. However, the proxy measure was found  
538 in independent samples to have a strong correlation with the standard measure ( $r=0.79$ ;  $r=0.89$   
539 adjusting for reliabilities). Future aims of research more generally will be to replicate these findings  
540 and to examine the relation of SPS to DTI in younger and older age groups and in other populations.

541 **5. Conclusions**

542 This is the first study to investigate the relation of SPS to neural anatomical measures using DTI. The  
543 study employed a relatively large sample of young healthy individuals, and it has identified several  
544 brain systems that may be critical to fully understanding the SPS trait, such as parietal/premotor  
545 connections. The study has also confirmed the involvement of several brain systems and areas  
546 previously correlated with SPS in fMRI studies, such as those for empathy and higher-order visual  
547 scene processing. Future research should focus on primary visual and auditory processing; higher-order  
548 somatosensory processing; attention flexibility and reward value processing. Also, the development of  
549 a proxy measure allows future research to examine the relation of SPS to other variables in the large  
550 YA-HCP sample, such as various genetic, functional imaging, and self-report data. Finally, DTI may  
551 be a valuable and fairly straightforward approach for future psychological and anatomical studies of  
552 normal individual differences because the scan can be acquired quickly and is often included in the  
553 usual battery of clinical scans.

554 **6. Conflict of interest**

555 The authors declare that the research was conducted in the absence of any commercial or financial  
556 relationships that could be construed as a potential conflict of interest.

557 **7. Funding**

558 The research of S.D. and A.L. is supported by VIDI Grant 639.072.411 from the Netherlands  
559 Organization for Scientific Research (NWO).

560 **8. Data statement**

561 All data are available at <https://db.humanconnectome.org>.

## 562 **9. References**

- 563 Acevedo, B., Aron, E., Pospos, S., Jessen, D., 2018. The functional highly sensitive brain: A review of  
564 the brain circuits underlying sensory processing sensitivity and seemingly related disorders.  
565 *Philos. Trans. R. Soc. B Biol. Sci.* <https://doi.org/10.1098/rstb.2017.0161>
- 566 Acevedo, B.P., Aron, A., Fisher, H.E., Brown, L.L., 2012. Neural correlates of long-term intense  
567 romantic love. *Soc. Cogn. Affect. Neurosci.* 7, 145–159. <https://doi.org/10.1093/scan/nsq092>
- 568 Acevedo, B.P., Aron, E.N., Aron, A., Sangster, M.D., Collins, N., Brown, L.L., 2014. The highly  
569 sensitive brain: An fMRI study of sensory processing sensitivity and response to others' emotions.  
570 *Brain Behav.* 4, 580–594. <https://doi.org/10.1002/brb3.242>
- 571 Acevedo, B.P., Jagiellowicz, J., Aron, E., Marhenke, R., Aron, A., 2017. Sensory processing sensitivity  
572 and childhood quality's effects on neural responses to emotional stimuli. *Clin. Neuropsychiatry.*
- 573 Aron, A., Ketay, S., Hedden, T., Aron, E.N., Markus, H.R., Gabrieli, J.D.E., 2010. Temperament trait  
574 of sensory processing sensitivity moderates cultural differences in neural response. *Soc. Cogn.*  
575 *Affect. Neurosci.* 5, 219–226. <https://doi.org/10.1093/scan/nsq028>
- 576 Aron, E.N., Aron, A., 1997. Sensory-Processing Sensitivity and Its Relation to Introversion and  
577 Emotionality. *J. Pers. Soc. Psychol.* <https://doi.org/10.1037/0022-3514.73.2.345>
- 578 Aron, E.N., Aron, A., Davies, K.M., 2005. Adult shyness: The interaction of temperamental sensitivity  
579 and an adverse childhood environment. *Personal. Soc. Psychol. Bull.* 31, 181–197.  
580 <https://doi.org/10.1177/0146167204271419>
- 581 Aron, E.N., Aron, A., Jagiellowicz, J., 2012. Sensory Processing Sensitivity: A Review in the Light of  
582 the Evolution of Biological Responsivity. *Personal. Soc. Psychol. Rev.* 16, 262–282.  
583 <https://doi.org/10.1177/1088868311434213>
- 584 Assary, E., Zavos, H.M.S., Krapohl, E., Keers, R., Pluess, M., 2020. Genetic architecture of  
585 Environmental Sensitivity reflects multiple heritable components: a twin study with adolescents.  
586 *Mol. Psychiatry.* <https://doi.org/10.1038/s41380-020-0783-8>
- 587 Avvenuti, G., Leo, A., Cecchetti, L., Franco, M.F., Travis, F., Caramella, D., Bernardi, G., Ricciardi,  
588 E., Pietrini, P., 2020. Reductions in perceived stress following Transcendental Meditation practice  
589 are associated with increased brain regional connectivity at rest. *Brain Cogn.* 139, 105517.  
590 <https://doi.org/10.1016/j.bandc.2020.105517>
- 591 Bammer, R., Markl, M., Barnett, A., Acar, B., Alley, M.T., Pelc, N.J., Glover, G.H., Moseley, M.E.,  
592 2003. Analysis and generalized correction of the effect of spatial gradient field distortions in  
593 diffusion-weighted imaging. *Magn. Reson. Med.* 50, 560–569.  
594 <https://doi.org/10.1002/mrm.10545>

- 595 Bathelt, J., Johnson, A., Zhang, M., Astle, D.E., 2019. The cingulum as a marker of individual  
596 differences in neurocognitive development. *Sci. Rep.* <https://doi.org/10.1038/s41598-019-38894->  
597 *z*
- 598 Baumeister, R.F., Vohs, K.D., DeWall, C.N., Zhang, L., 2007. How Emotion Shapes Behavior:  
599 Feedback, Anticipation, and Reflection, Rather Than Direct Causation. *Personal. Soc. Psychol.*  
600 *Rev.* 11, 167–203. <https://doi.org/10.1177/1088868307301033>
- 601 Belsky, J., Pluess, M., 2009. Beyond Diathesis Stress: Differential Susceptibility to Environmental  
602 Influences. *Psychol. Bull.* 135, 885–908. <https://doi.org/10.1037/a0017376>
- 603 Cameron, C.D., Reber, J., Spring, V.L., Tranel, D., 2018. Damage to the ventromedial prefrontal cortex  
604 is associated with impairments in both spontaneous and deliberative moral judgments.  
605 *Neuropsychologia* 111, 261–268. <https://doi.org/10.1016/j.neuropsychologia.2018.01.038>
- 606 Cavanna, A.E., 2007. The precuneus and consciousness. *CNS Spectr.*  
607 <https://doi.org/10.1017/S1092852900021295>
- 608 Cavanna, A.E., Trimble, M.R., 2006. The precuneus: A review of its functional anatomy and  
609 behavioural correlates. *Brain.* <https://doi.org/10.1093/brain/awl004>
- 610 Craig, A.D., 2009. How do you feel - now? The anterior insula and human awareness. *Nat. Rev.*  
611 *Neurosci.* <https://doi.org/10.1038/nrn2555>
- 612 De La Vega, A., Chang, L.J., Banich, M.T., Wager, T.D., Yarkoni, T., 2016. Large-scale meta-analysis  
613 of human medial frontal cortex reveals tripartite functional organization. *J. Neurosci.* 36, 6553–  
614 6562. <https://doi.org/10.1523/JNEUROSCI.4402-15.2016>
- 615 Dunlop, K., Hanlon, C.A., Downar, J., 2017. Noninvasive brain stimulation treatments for addiction  
616 and major depression. *Ann. N. Y. Acad. Sci.* <https://doi.org/10.1111/nyas.12985>
- 617 Eklund, A., Nichols, T.E., Knutsson, H., 2016. Cluster failure: Why fMRI inferences for spatial extent  
618 have inflated false-positive rates. *Proc. Natl. Acad. Sci.* 113, 7900–7905.  
619 <https://doi.org/10.1073/pnas.1602413113>
- 620 Essen, D.C. Van, Ugurbil, K., Auerbach, E., Barch, D., Behrens, T.E.J.J., Bucholz, R., Chang, A.,  
621 Chen, L., Corbetta, M., Curtiss, S.W., Penna, S. Della, Feinberg, D., Glasser, M.F., Harel, N.,  
622 Heath, A.C., Larson-prior, L., Marcus, D., Michalareas, G., Moeller, S., Oostenveld, R., Petersen,  
623 S.E., Prior, F., Schlaggar, B.L., Smith, S.M., Snyder, A.Z., Xu, J., Yacoub, E., Consortium,  
624 W.H.C.P., Eeg, M.E.G., Van Essen, D.C., Ugurbil, K., Auerbach, E., Barch, D., Behrens, T.E.J.J.,  
625 Bucholz, R., Chang, A., Chen, L., Corbetta, M., Curtiss, S.W., Della Penna, S., Feinberg, D.,  
626 Glasser, M.F., Harel, N., Heath, A.C., Larson-prior, L., Marcus, D., Michalareas, G., Moeller, S.,  
627 Oostenveld, R., Petersen, S.E., Prior, F., Schlaggar, B.L., Smith, S.M., Snyder, A.Z., Xu, J.,

- 628 Yacoub, E., 2012. The Human Connectome Project: A data acquisition perspective. *Neuroimage*  
629 62, 2222–2231. <https://doi.org/10.1016/j.neuroimage.2012.02.018>
- 630 Glasser, M.F., Sotiropoulos, S.N., Wilson, J.A., Coalson, T.S., Fischl, B., Andersson, J.L., Xu, J.,  
631 Jbabdi, S., Webster, M., Polimeni, J.R., Van Essen, D.C., Jenkinson, M., 2013. The minimal  
632 preprocessing pipelines for the Human Connectome Project. *Neuroimage* 80, 105–124.  
633 <https://doi.org/10.1016/j.neuroimage.2013.04.127>
- 634 Greven, C.U., Lionetti, F., Booth, C., Aron, E.N., Fox, E., Schendan, H.E., Pluess, M., Bruining, H.,  
635 Acevedo, B., Bijttebier, P., Homberg, J., 2019. Sensory Processing Sensitivity in the context of  
636 Environmental Sensitivity: A critical review and development of research agenda. *Neurosci.*  
637 *Biobehav. Rev.* <https://doi.org/10.1016/j.neubiorev.2019.01.009>
- 638 Hebscher, M., Gilboa, A., 2016. A boost of confidence: The role of the ventromedial prefrontal cortex  
639 in memory, decision-making, and schemas. *Neuropsychologia* 90, 46–58.  
640 <https://doi.org/10.1016/j.neuropsychologia.2016.05.003>
- 641 Hedden, T., Ketay, S., Aron, A., Markus, H.R., Gabrieli, J.D.E., 2008. Cultural influences on neural  
642 substrates of attentional control. *Psychol. Sci.* 19, 12–17. [https://doi.org/10.1111/j.1467-](https://doi.org/10.1111/j.1467-9280.2008.02038.x)  
643 [9280.2008.02038.x](https://doi.org/10.1111/j.1467-9280.2008.02038.x)
- 644 Hein, G., Knight, R.T., 2008. Superior temporal sulcus - It's my area: Or is it? *J. Cogn. Neurosci.*  
645 <https://doi.org/10.1162/jocn.2008.20148>
- 646 Hiser, J., Koenigs, M., 2018. The Multifaceted Role of the Ventromedial Prefrontal Cortex in Emotion,  
647 Decision Making, Social Cognition, and Psychopathology. *Biol. Psychiatry* 83, 638–647.  
648 <https://doi.org/10.1016/j.biopsych.2017.10.030>
- 649 Holmes, A.P., Blair, R.C., Watson, J.D.G., Ford, I., 1996. Nonparametric analysis of statistic images  
650 from functional mapping experiments. *J. Cereb. Blood Flow Metab.* 16, 7–22.  
651 <https://doi.org/10.1097/00004647-199601000-00002>
- 652 Horowitz, A., Barazany, D., Tavor, I., Bernstein, M., Yovel, G., Assaf, Y., 2015. In vivo correlation  
653 between axon diameter and conduction velocity in the human brain. *Brain Struct. Funct.* 220,  
654 1777–1788. <https://doi.org/10.1007/s00429-014-0871-0>
- 655 Hurlburt, R.T., Alderson-Day, B., Kuhn, S., Fernyhough, C., 2016. Exploring the Ecological Validity  
656 of Thinking on Demand: Neural Correlates of Elicited vs. Spontaneously Occurring Inner Speech.  
657 *PLoS One* 11, e0147932. <https://doi.org/10.1371/journal.pone.0147932>
- 658 Iacoboni, M., Woods, R.P., Brass, M., Bekkering, H., Mazziotta, J.C., Rizzolatti, G., 1999. Cortical  
659 mechanisms of human imitation. *Science* (80-. ). 286, 2526–2528.  
660 <https://doi.org/10.1126/science.286.5449.2526>

- 661 Jabbi, M., Keysers, C., 2008. Inferior Frontal Gyrus Activity Triggers Anterior Insula Response to  
662 Emotional Facial Expressions. *Emotion* 8, 775–780. <https://doi.org/10.1037/a0014194>
- 663 Jagiellowicz, J., Xu, X., Aron, A., Aron, E., Cao, G., Feng, T., Weng, X., 2011. The trait of sensory  
664 processing sensitivity and neural responses to changes in visual scenes. *Soc. Cogn. Affect.*  
665 *Neurosci.* 6, 38–47. <https://doi.org/10.1093/scan/nsq001>
- 666 Kagan, J., 1997. Temperament and the Reactions to Unfamiliarity. *Child Dev.*  
667 <https://doi.org/10.1111/j.1467-8624.1997.tb01931.x>
- 668 Karam, E.G., Fayyad, J.A., Farhat, C., Pluess, M., Haddad, Y.C., Tabet, C.C., Farah, L., Kessler, R.C.,  
669 2019. Role of childhood adversities and environmental sensitivity in the development of post-  
670 traumatic stress disorder in war-exposed Syrian refugee children and adolescents. *Br. J.*  
671 *Psychiatry.* <https://doi.org/10.1192/bjp.2018.272>
- 672 Lebel, C., Walker, L., Leemans, A., Phillips, L., Beaulieu, C., 2008. Microstructural maturation of the  
673 human brain from childhood to adulthood. *Neuroimage* 40, 1044–1055.  
674 <https://doi.org/10.1016/j.neuroimage.2007.12.053>
- 675 Leemans, A., Jeurissen, B., Sijbers, J., Jones, D.K., Jeurissen, B., Sijbers, J., Jones, D.K., 2009.  
676 ExploreDTI: a graphical toolbox for processing, analyzing, and visualizing diffusion MR data.  
677 *Proc. Int. Soc. Magn. Reson. Med.* 17, 3537. <https://doi.org/10.1093/occmmed/kqr069>
- 678 Leow, R., 2018. Explicit learning and depth of processing in the instructed setting: Theory, research,  
679 and practice. *Stud. English Educ.* 23, 769–801. <https://doi.org/10.22275/see.23.4.01>
- 680 Lionetti, F., Aron, A., Aron, E.N., Burns, G.L., Jagiellowicz, J., Pluess, M., 2018. Dandelions, tulips  
681 and orchids: Evidence for the existence of low-sensitive, medium-sensitive and high-sensitive  
682 individuals. *Transl. Psychiatry* 8, 1–11. <https://doi.org/10.1038/s41398-017-0090-6>
- 683 Lockhart, R.S., Craik, F.I.M., Jacoby, L., 1976. Depth of processing, recognition and recall. *Recall*  
684 *Recognit.* 75–102.
- 685 Mar, R.A., 2011. The Neural Bases of Social Cognition and Story Comprehension. *Annu. Rev.*  
686 *Psychol.* 62, 103–134. <https://doi.org/10.1146/annurev-psych-120709-145406>
- 687 Mayberg, H.S., Liotti, M.M., Brannan, S.K., McGinnis, S., Mahurin, R.K., Jerabek, P.A., Silva, J.A.,  
688 Tekell, J.L., Martin, C.C., Lancaster, J.L., Fox, P.T., 2013. Reciprocal limbic-cortical function  
689 and negative mood: Converging PET findings in depression and normal sadness. *Depress. Sci.*  
690 *Ment. Heal.* 6, 245–253. <https://doi.org/10.1176/ajp.156.5.675>
- 691 Mesri, H.Y., David, S., Viergever, M.A., Leemans, A., 2019. The adverse effect of gradient  
692 nonlinearities on diffusion MRI: From voxels to group studies. *Neuroimage* 116127.  
693 <https://doi.org/10.1016/j.neuroimage.2019.116127>

- 694 Milner, A.D., Goodale, M.A., 2008. Two visual systems re-viewed. *Neuropsychologia* 46, 774–785.  
695 <https://doi.org/10.1016/j.neuropsychologia.2007.10.005>
- 696 Nichols, T., Holmes, A., 2003. Nonparametric Permutation Tests for Functional Neuroimaging. *Hum.*  
697 *Brain Funct. Second Ed.* 25, 887–910. <https://doi.org/10.1016/B978-012264841-0/50048-2>
- 698 Nir, T.M., Jahanshad, N., Villalon-Reina, J.E., Toga, A.W., Jack, C.R., Weiner, M.W., Thompson,  
699 P.M., 2013. Effectiveness of regional DTI measures in distinguishing Alzheimer’s disease, MCI,  
700 and normal aging. *NeuroImage Clin.* 3, 180–195. <https://doi.org/10.1016/j.nicl.2013.07.006>
- 701 Nocentini, A., Menesini, E., Pluess, M., 2018. The Personality Trait of Environmental Sensitivity  
702 Predicts Children’s Positive Response to School-Based Antibullying Intervention. *Clin. Psychol.*  
703 *Sci.* 6, 848–859. <https://doi.org/10.1177/2167702618782194>
- 704 Pluess, M., 2015. Individual Differences in Environmental Sensitivity. *Child Dev. Perspect.* 9, 138–  
705 143. <https://doi.org/10.1111/cdep.12120>
- 706 Pluess, M., Assary, E., Lionetti, F., Lester, K.J., Krapohl, E., Aron, E.N., Aron, A., 2018.  
707 Environmental sensitivity in children: Development of the highly sensitive child scale and  
708 identification of sensitivity groups. *Dev. Psychol.* <https://doi.org/10.1037/dev0000406>
- 709 Pluess, M., Belsky, J., 2010. Differential Susceptibility to Parenting and Quality Child Care. *Dev.*  
710 *Psychol.* 46, 379–390. <https://doi.org/10.1037/a0015203>
- 711 Pluess, M., Boniwell, I., 2015. Sensory-Processing Sensitivity predicts treatment response to a school-  
712 based depression prevention program: Evidence of Vantage Sensitivity. *Pers. Individ. Dif.* 82, 40–  
713 45. <https://doi.org/10.1016/j.paid.2015.03.011>
- 714 Rizzolatti, G., Riggio, L., Dascola, I., Umiltá, C., 1987. Reorienting attention across the horizontal and  
715 vertical meridians: Evidence in favor of a premotor theory of attention. *Neuropsychologia* 25, 31–  
716 40. [https://doi.org/10.1016/0028-3932\(87\)90041-8](https://doi.org/10.1016/0028-3932(87)90041-8)
- 717 Schubotz, R.I., 2007. Prediction of external events with our motor system: towards a new framework.  
718 *Trends Cogn. Sci.* 11, 211–218. <https://doi.org/10.1016/j.tics.2007.02.006>
- 719 Schubotz, R.I., Von Cramon, D.Y., 2003. Functional-anatomical concepts of human premotor cortex:  
720 Evidence from fMRI and PET studies, in: *NeuroImage*. Academic Press Inc., pp. S120–S131.  
721 <https://doi.org/10.1016/j.neuroimage.2003.09.014>
- 722 Sescousse, G., Caldú, X., Segura, B., Dreher, J.C., 2013. Processing of primary and secondary rewards:  
723 A quantitative meta-analysis and review of human functional neuroimaging studies. *Neurosci.*  
724 *Biobehav. Rev.* 37, 681–696. <https://doi.org/10.1016/j.neubiorev.2013.02.002>
- 725 Shao, R., Keuper, K., Geng, X., Lee, T.M.C., 2016. Pons to Posterior Cingulate Functional Projections  
726 Predict Affective Processing Changes in the Elderly Following Eight Weeks of Meditation



- 727 Training. *EBioMedicine* 10, 236–248. <https://doi.org/10.1016/j.ebiom.2016.06.018>
- 728 Smith, S.M., Nichols, T.E., 2009. Threshold-free cluster enhancement: Addressing problems of  
729 smoothing, threshold dependence and localisation in cluster inference. *Neuroimage* 44, 83–98.  
730 <https://doi.org/10.1016/j.neuroimage.2008.03.061>
- 731 Soares, J.M., Marques, P., Alves, V., Sousa, N., 2013. A hitchhiker’s guide to diffusion tensor imaging.  
732 *Front. Neurosci.* 7, 1–14. <https://doi.org/10.3389/fnins.2013.00031>
- 733 Sotiropoulos, S.N., Jbabdi, S., Xu, J., Andersson, J.L., Moeller, S., Auerbach, E.J., Glasser, M.F.,  
734 Hernandez, M., Sapiro, G., Jenkinson, M., Feinberg, D.A., Yacoub, E., Lenglet, C., Van Essen,  
735 D.C., Ugurbil, K., Behrens, T.E.J., 2013. Advances in diffusion MRI acquisition and processing  
736 in the Human Connectome Project. *Neuroimage* 80, 125–143.  
737 <https://doi.org/10.1016/j.neuroimage.2013.05.057>
- 738 Takeuchi, H., Taki, Y., Nouchi, R., Yokoyama, R., Kotozaki, Y., Nakagawa, S., Sekiguchi, A., Iizuka,  
739 K., Yamamoto, Y., Hanawa, S., Araki, T., Miyauchi, C.M., Sakaki, K., Sassa, Y., Nozawa, T.,  
740 Ikeda, S., Yokota, S., Daniele, M., Kawashima, R., 2019. Empathizing associates with mean  
741 diffusivity. *Sci. Rep.* 9. <https://doi.org/10.1038/s41598-019-45106-1>
- 742 Tax, C.M.W., Otte, W.M., Viergever, M.A., Dijkhuizen, R.M., Leemans, A., 2015. REKINDLE:  
743 Robust Extraction of Kurtosis INDices with Linear Estimation. *Magn. Reson. Med.* 73, 794–808.  
744 <https://doi.org/10.1002/mrm.25165>
- 745 Ungerleider, L.G., Haxby, J. V., 1994. “What” and “where” in the human brain. *Curr. Opin. Neurobiol.*  
746 4, 157–165. [https://doi.org/10.1016/0959-4388\(94\)90066-3](https://doi.org/10.1016/0959-4388(94)90066-3)
- 747 Van Overwalle, F., Baetens, K., 2009. Understanding others’ actions and goals by mirror and  
748 mentalizing systems: A meta-analysis. *Neuroimage*.  
749 <https://doi.org/10.1016/j.neuroimage.2009.06.009>
- 750 Voineskos, A.N., Rajji, T.K., Lobaugh, N.J., Miranda, D., Shenton, M.E., Kennedy, J.L., Pollock,  
751 B.G., Mulsant, B.H., 2012. Age-related decline in white matter tract integrity and cognitive  
752 performance: A DTI tractography and structural equation modeling study. *Neurobiol. Aging* 33,  
753 21–34. <https://doi.org/10.1016/j.neurobiolaging.2010.02.009>
- 754 Vos, S.B., Jones, D.K., Viergever, M.A., Leemans, A., 2011. Partial volume effect as a hidden  
755 covariate in DTI analyses. *Neuroimage* 55, 1566–1576.  
756 <https://doi.org/10.1016/j.neuroimage.2011.01.048>
- 757 Warrier, C., Wong, P., Penhune, V., Zatorre, R., Parrish, T., Abrams, D., Kraus, N., 2009. Relating  
758 structure to function: Heschl’s gyrus and acoustic processing. *J. Neurosci.* 29, 61–69.  
759 <https://doi.org/10.1523/JNEUROSCI.3489-08.2009>



- 760 Winkler, A.M., Ridgway, G.R., Douaud, G., Nichols, T.E., Smith, S.M., 2016a. Faster permutation  
761 inference in brain imaging. *Neuroimage* 141, 502–516.  
762 <https://doi.org/10.1016/j.neuroimage.2016.05.068>
- 763 Winkler, A.M., Ridgway, G.R., Webster, M.A., Smith, S.M., Nichols, T.E., 2014. Permutation  
764 inference for the general linear model. *Neuroimage* 92, 381–397.  
765 <https://doi.org/10.1016/j.neuroimage.2014.01.060>
- 766 Winkler, A.M., Webster, M.A., Brooks, J.C., Tracey, I., Smith, S.M., Nichols, T.E., 2016b. Non-  
767 parametric combination and related permutation tests for neuroimaging. *Hum. Brain Mapp.* 37,  
768 1486–1511. <https://doi.org/10.1002/hbm.23115>
- 769 Wolf, M., Van Doorn, G.S., Weissing, F.J., 2008. Evolutionary emergence of responsive and  
770 unresponsive personalities. *Proc. Natl. Acad. Sci. U. S. A.*  
771 <https://doi.org/10.1073/pnas.0805473105>
- 772 Wollenberg, L., Deubel, H., Szinte, M., 2018. Visual attention is not deployed at the endpoint of  
773 averaging saccades. *PLoS Biol.* 16, e2006548. <https://doi.org/10.1371/journal.pbio.2006548>
- 774 Xu, J., Potenza, M.N., 2012. White matter integrity and five-factor personality measures in healthy  
775 adults. *Neuroimage* 59, 800–807. <https://doi.org/10.1016/j.neuroimage.2011.07.040>  
776

777

Figures

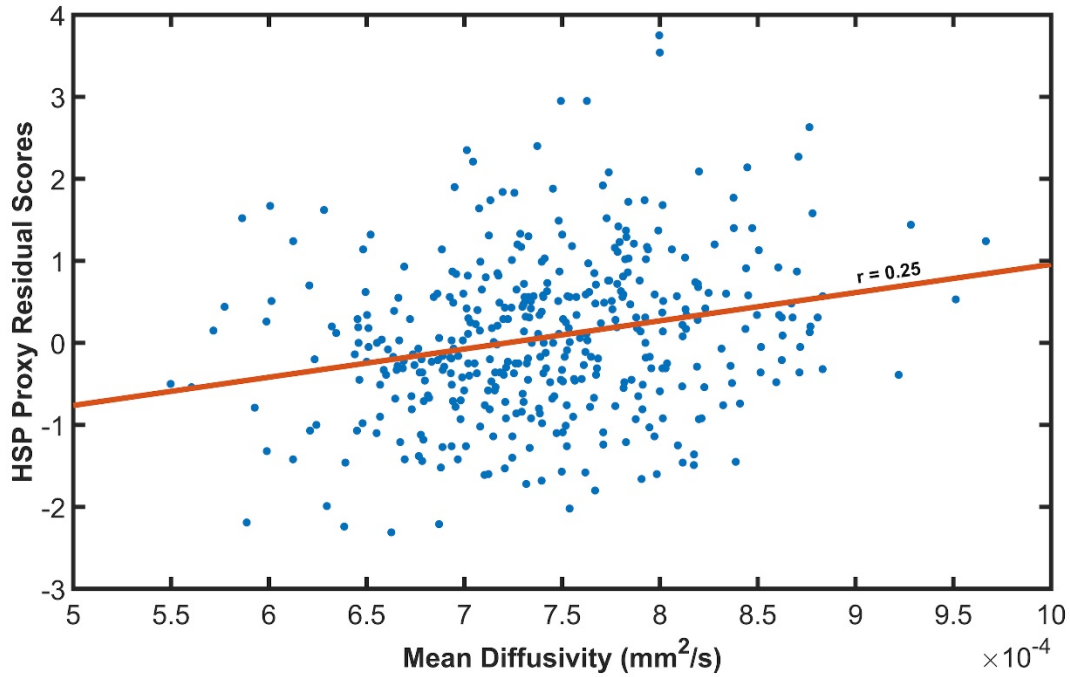

778

779

Figure 1

780

Mean diffusivity correlation with HSP residual score (standard deviations from the mean) in a voxel in the right medial prefrontal cortex, within the cingulum bundle (MNI: 12, 44, -10; see Fig. 2). This

781

voxel showed the highest Cohen's D effect size for the whole brain analysis (0.27; t=5.24).

782

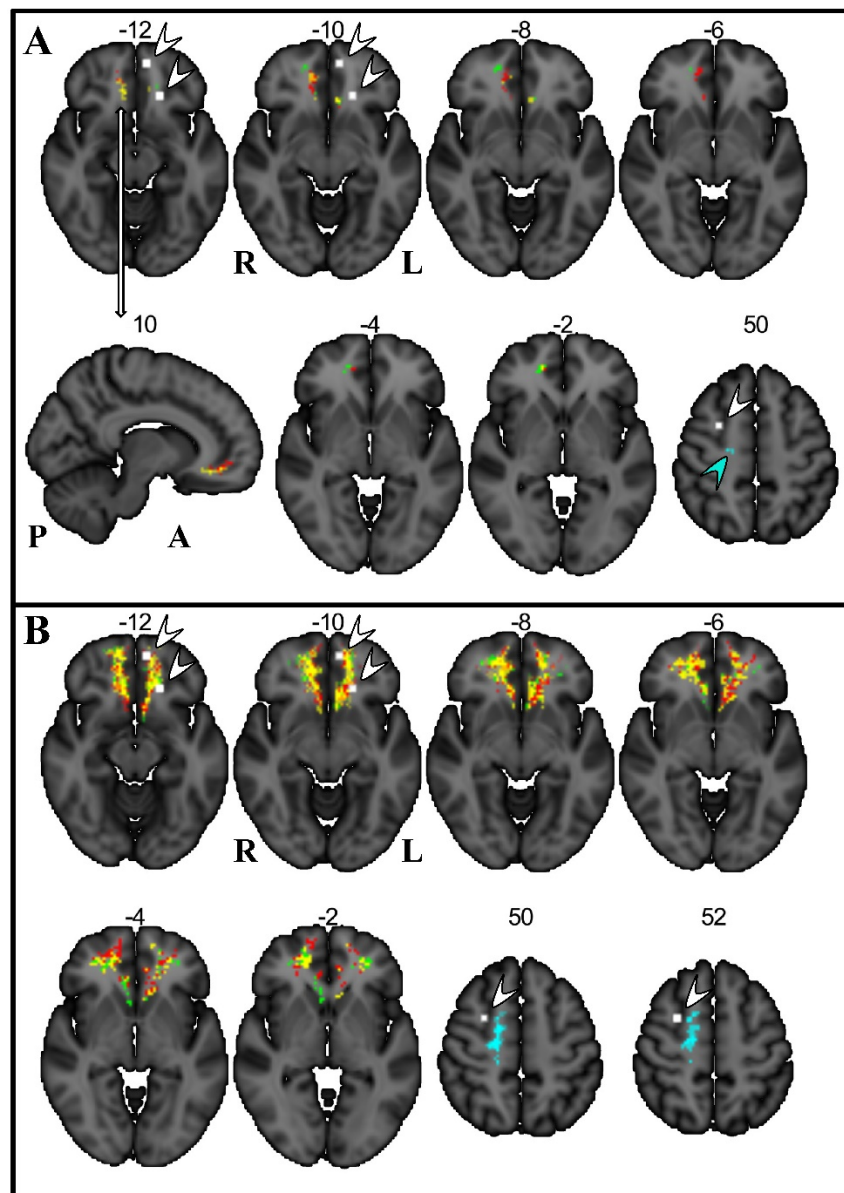

783

784 Figure 2

785 Voxelwise results presented in MNI stereotaxic space on axial and sagittal sections.

786 A. Voxels in color show statistically significant correlations with HSP proxy questionnaire scores.  
787 They are located in the ventromedial prefrontal cortex, mostly on the right, within the forceps minor  
788 of the corpus callosum and the subcallosal cingulum bundle. The correlated voxels extend about 10  
789 mm axially and about 25 mm antero-posteriorly. Significant voxels are also on the left, mostly in the  
790 subcallosal area. B. Colors show largest voxel clusters above Cohen's D effect size of 0.10 without  
791 considering statistical significance (see Methods).

792

793 Red: positive correlation with MD (mean diffusivity); Green: positive correlation with RD (radial  
794 diffusivity); Yellow: the overlap of MD and RD; Blue and blue arrow: negative correlation with FA  
795 (fractional anisotropy); White voxels and white arrows: locations of fMRI activations that correlated  
796 with HSP questionnaire scores in a previous study when participants viewed a romantic partner and a  
797 stranger, happy or sad (Acevedo et al., 2014).

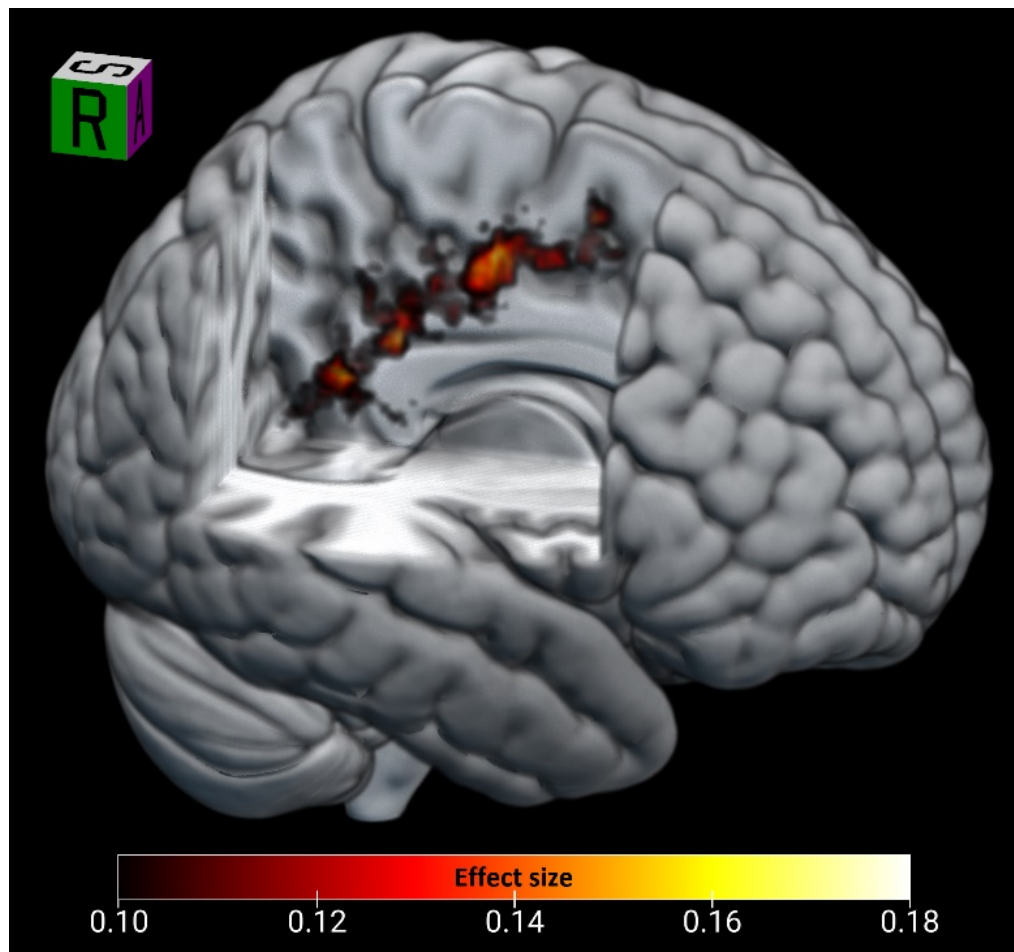

798  
799  
800  
801  
802

Figure 3

3D render of the largest FA cluster (negatively correlated with HSP score). The cluster extends from the premotor cortex through the primary motor and somatosensory cortex into the supramarginal gyrus.

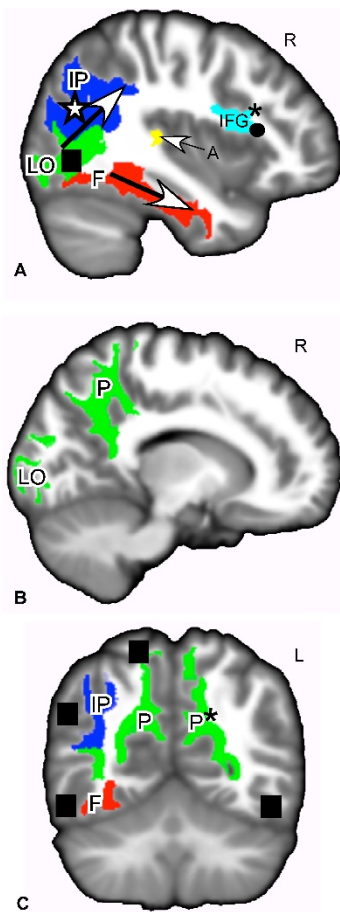

803

804 Figure 4.

805 White matter regions of interest where MD, RD or FA showed positive or negative correlations with  
 806 HSP proxy questionnaire scores.

807 A. Sagittal slice through ROIs that showed a correlation between HSP-proxy scores and DTI  
 808 measures. These ROIs are white matter of the ventral pathway for visual processing (LO,F  
 809 bottom arrow), dorsal pathway for visual processing (IP, top arrow), primary auditory  
 810 processing (A), and empathic responses (IFG\*).

811 B. Sagittal slice through regions that showed a positive correlation between RD and the HSP-  
 812 proxy scores. The ROIs are white matter of the ventral and dorsal visual pathways (LO, P).

813 C. Coronal slice through white matter regions involved in the ventral and dorsal visual pathway  
 814 (F,IP,P) that showed correlations between questionnaire scores and MD, RD and FA. These  
 815 regions are connected to gray matter areas associated with SPS (■)

816 Red: MD positive correlation; Green: RD positive correlation; Yellow: MD+RD positive correlations;  
 817 Dark Blue; FA negative correlation; Light Blue: FA negative+RD positive correlation.

818 \*  $p < 0.05$ . Otherwise,  $p$  values ranged from 0.06-0.09. Effect sizes -0.165 to + 0.151. See Table 3.

819

820 Shape symbols indicate where previous fMRI and behavioral studies of SPS found activations  
 821 implicating heightened sensory processing, empathy, attention and self-other processing.

822

823 ■ Jagiellowicz et al., 2010

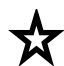

★ Acevedo et al., 2014, 2017 ● Acevedo et al., 2014

824 Abbreviations: A, primary auditory cortex. F, fusiform. IFG, inferior frontal gyrus. IP= Inferior  
 825 parietal/angular gyrus/temporoparietal junction/supramarginal gyrus. LO, lateral occipital area. P,  
 826 precuneus. MD, mean diffusivity. RD, radial diffusivity. FA, fractional anisotropy.

827

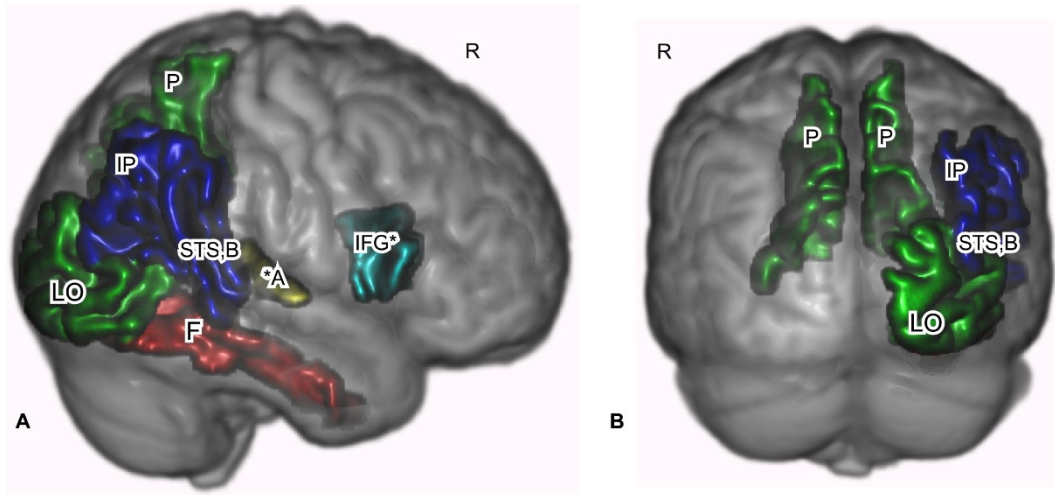

828

829

830 Figure 5

831 Primary sensory, higher order sensory processing and cognitive processing regions were identified as  
832 correlated with the HSP proxy scores. Freesurfer-based ROIs are shown for white matter where  
833 Cohen's D effect size was -0.147 to +0.151, rendered in 3D on a template brain. Areas include the  
834 general path of the dorsal and ventral visual pathways. A. Sagittal view of the right side. B. Posterior  
835 view.

836

837 Red: MD positive correlation with HSP proxy questionnaire scores. Green: RD positive correlation.  
838 Blue: FA negative correlation. Gold: MD and RD positive correlation. Aquamarine in IFG: RD and  
839 FA correlations. \* $p < 0.05$ . Otherwise,  $p$  values were 0.06-0.09. See Table 3.

840

841 Abbreviations: A, primary auditory cortex. F, fusiform. IFG, inferior frontal gyrus. IP, inferior parietal  
842 including angular gyrus/temporoparietal junction/supramarginal gyrus. LO, lateral occipital cortex. P,  
843 precuneus. STS,B- bank of the superior temporal sulcus. MD, mean diffusivity. RD, radial diffusivity.  
844 FA, fractional anisotropy.

845

846 Table 1: The HSP-Proxy Scale (17 items) Developed From Questions in the NIH Toolbox Used for  
847 the Human Connectome Project.

848

849 From the NIH Toolbox Loneliness (Ages 18+) – Fixed Form

850 In the past month how often (from 1=never to 5=Always)

851 1. Act like my problems aren't that important [Soc 276]\*

852 2. Criticize the way I do things [Soc264]

853 From the NIH Toolbox Emotion Anger-Affect (Ages 18+) – Fixed Form.

854 In the past 7 days (from 1=never to 5=Always)

855 3. I was irritated more than people knew [Anger31]

856 4. I felt annoyed [Anger50]

857 From the NIH Toolbox Fear (Ages 18+) – Item Bank

858 In the past 7 days (from 1=never to 5=Always)

859 5. I felt uneasy [Anxiety62]

860 From the NIH Toolbox Self-Efficacy (Ages 18+) – Item Bank/Fixed Form

861 ...how true is it of you in general (from 1=never to 5=Very Often)

862 6. If I am in trouble, I can think of a solution [GSE09]

863 From the NIH Toolbox Perceived stress (Ages 18+) – Item Bank/Fixed Form

864 In the past month... (from 1=never to 5=Very Often)

865 7. How often have you been upset because of something that happened unexpectedly? [SC001]

866 8. How often have you felt nervous and "stressed"? [SC003]

867 From the NEO-FFI-R (McCrae & Costa, 2004), included in the NIH Toolbox

868 ...circle the response which best describes your opinion of yourself (from SD Strongly disagree—

869 definitely false to SA Strongly agree—definitely true; for analyses, coded 1 to 5]

870 9. I am not a worrier [NEORAW\_\_01\_Num, reverse coded]

871 10. I enjoy concentrating on a fantasy or daydream and exploring all its possibilities, letting it grow

872 and develop [NEORAW\_\_03\_Num]

873 11. When I'm under lots of stress, I sometimes feel like I'm going to pieces[NEORAW\_11\_Num]

874 12. I am intrigued by the patterns I find in art and nature [NEORAW\_13\_Num]

875 13. I often feel tense and jittery [NEORAW\_21\_Num]

876 14. I often get angry at the way people treat me [NEORAW\_36\_Num]

877 15. I experience a wide range of emotions or feelings [NEORAW\_38\_Num]

878 16. When I read a poem or view art, I sometimes feel a wave of excitement[NEORAW\_43\_Num]

879 17. Poetry has little or no effect on me [NEORAW\_\_23\_Num, reverse coded]

880

881

882 \*Note: codes in brackets are codes used for items in NIH Tool Box data sets

883



**Sensory Processing Sensitivity and Axonal Microarchitecture**

884 Table 2. Whole brain exploratory analysis. Brain white matter areas showed positive and negative  
 885 correlations between diffusion tensor imaging measures and proxy HSP scores for Sensory Processing  
 886 Sensitivity. X/Y/Z denotes the MNI coordinates for the peak voxel within the cluster. Effect size is  
 887 defined as Cohen’s D.  
 888

| <b>Brain Region</b>                                                                                     | x  | y   | z   | # of Voxels | p-value | Peak effect size |
|---------------------------------------------------------------------------------------------------------|----|-----|-----|-------------|---------|------------------|
| <b><i>MD, Positive Correlation:</i></b><br><i>ventromedial prefrontal cortex/<br/>Cingulate cortex:</i> |    |     |     |             |         |                  |
| Anterior/Ventral Subcallosal Cingulum Bundle and Forceps minor of corpus callosum                       | 12 | 44  | -10 | 58          | 0.018   | 0.269            |
| Anterior/Ventral Cingulum Bundle                                                                        | -6 | 26  | -10 | 7           | 0.028   | 0.243            |
| <b><i>RD, Positive Correlation:</i></b><br><i>ventromedial and lateral prefrontal cortex</i>            |    |     |     |             |         |                  |
| Anterior/Ventral Subcallosal Cingulum Bundle and Forceps minor of corpus callosum                       | 10 | 36  | -12 | 29          | 0.041   | 0.170            |
| Anterior/Ventral Cingulum Bundle                                                                        | -6 | 26  | -10 | 3           | 0.033   | 0.228            |
| Anterior/Ventral Cingulum Bundle                                                                        | 18 | 48  | 0   | 21          | 0.032   | 0.232            |
| <b><i>FA, Negative correlation;</i></b><br><i>motor/premotor cortical region</i>                        |    |     |     |             |         |                  |
| Premotor area                                                                                           | 22 | -14 | 52  | 6           | 0.042   | -0.181           |

889



**Sensory Processing Sensitivity and Axonal Microarchitecture**

890 Table 3. Region of Interest analysis. White matter areas with Cohen Effect Sizes >0.1 and p values  
 891 at statistically significant, or marginally significant values.  
 892

| White Matter Regions                                                             | Side | MD          |         | RD           |             | FA            |             |
|----------------------------------------------------------------------------------|------|-------------|---------|--------------|-------------|---------------|-------------|
|                                                                                  |      | Effect size | P-value | Effect size  | P-value     | Effect size   | P-value     |
| Inferior Frontal Gyrus/Parsopercularis                                           | R    |             |         | 0.137        | 0.07        | <b>-0.165</b> | <b>0.02</b> |
|                                                                                  | L    |             |         |              |             |               |             |
| Precuneus                                                                        | R    |             |         | 0.143        | 0.06        |               |             |
|                                                                                  | L    |             |         | <b>0.151</b> | <b>0.04</b> |               |             |
| Superior Temporal Sulcus, Bank                                                   | R    |             |         |              |             | -0.147        | 0.06        |
|                                                                                  | L    |             |         |              |             |               |             |
| Transverse Temporal/Auditory                                                     | R    | 0.143       | 0.06    | 0.131        | 0.09        |               |             |
| Lateral Occipital                                                                | R    |             |         | 0.140        | 0.07        |               |             |
|                                                                                  | L    |             |         |              |             |               |             |
| Fusiform                                                                         | R    | 0.137       | 0.08    |              |             |               |             |
| Inferior Parietal (angular gyrus, temporoparietal junction, supramarginal gyrus) | R    |             |         |              |             | -0.136        | 0.08        |
|                                                                                  | L    |             |         |              |             |               |             |

893
